# Supplementary material
Source: Springer Nature journal article supplement (https://www.springermedizin.de/resource/supplementary/13054_2013_2231_MOESM2_ESM.pdf/9713856)
Supplement: MOESM2 [file 9713856]

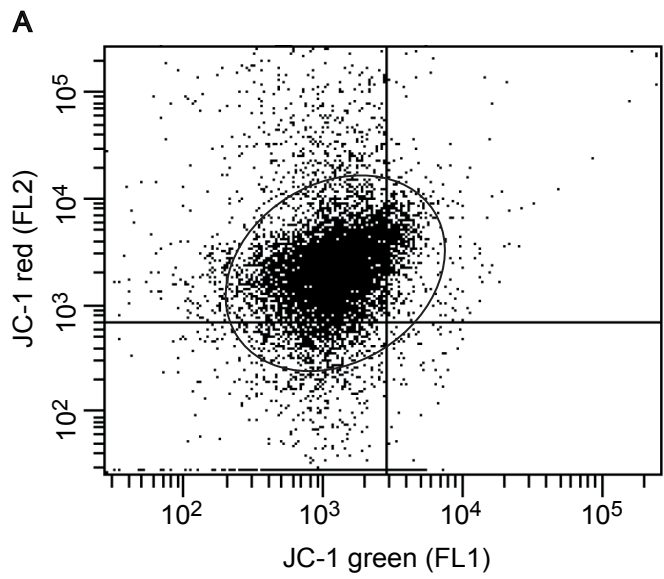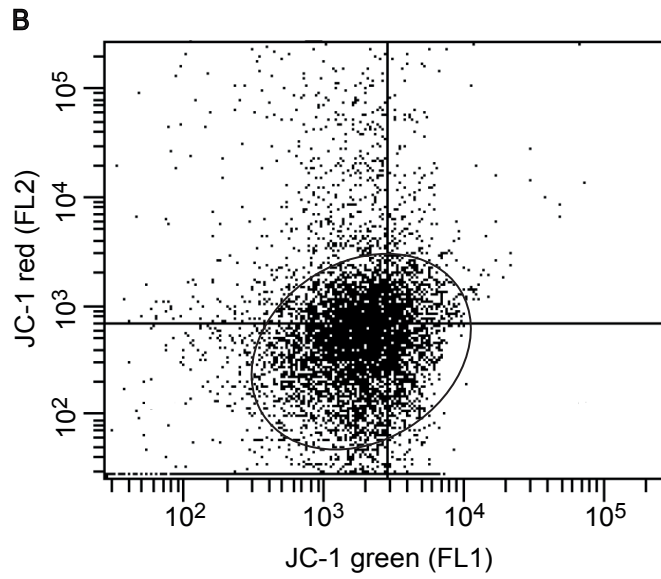

Gründler *et al.*\_supplemental figure 1
